# Supplementary material for: Ligand control in the photochemical generation of high-valent porphyrin-iron–oxo derivatives
Source: Royal Society of Chemistry journal article supplement (doi:10.1039/c5cc02852c), 2015-01-01
Supplement: c5cc02852c1.pdf [file c5cc02852c1.pdf]

## Supplementary Information

### **Ligand control in photochemical generation of high-valent porphyrin-iron-oxo derivatives**

Tse-Hong Chen, Nawras Asiri, Ka Wai Kwong, Jonathan Malone and Rui Zhang

#### **Contents**

|                       |        |
|-----------------------|--------|
| Figure S1 and S2..... | Page 2 |
| Figure S3 .....       | Page 3 |

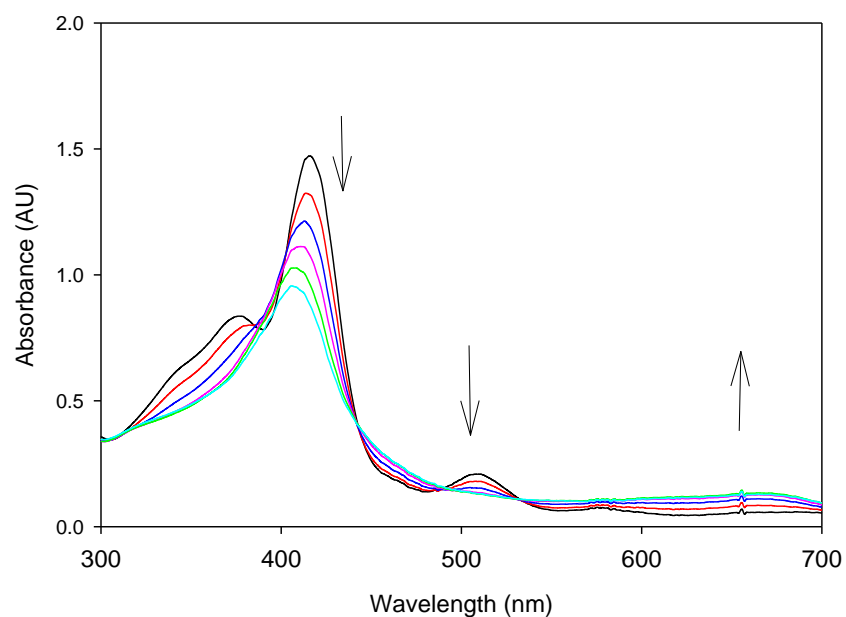

**Fig. S1.** UV-visible spectra of  $\text{Fe}^{\text{IV}}(\text{O})(\text{TMP})^+$  (**3a**) produced by oxidation of  $\text{Fe}^{\text{III}}(\text{TMP})\text{Cl}$  with mCPBA (20 equiv.) in  $\text{CH}_3\text{CN}$  over 80 s.

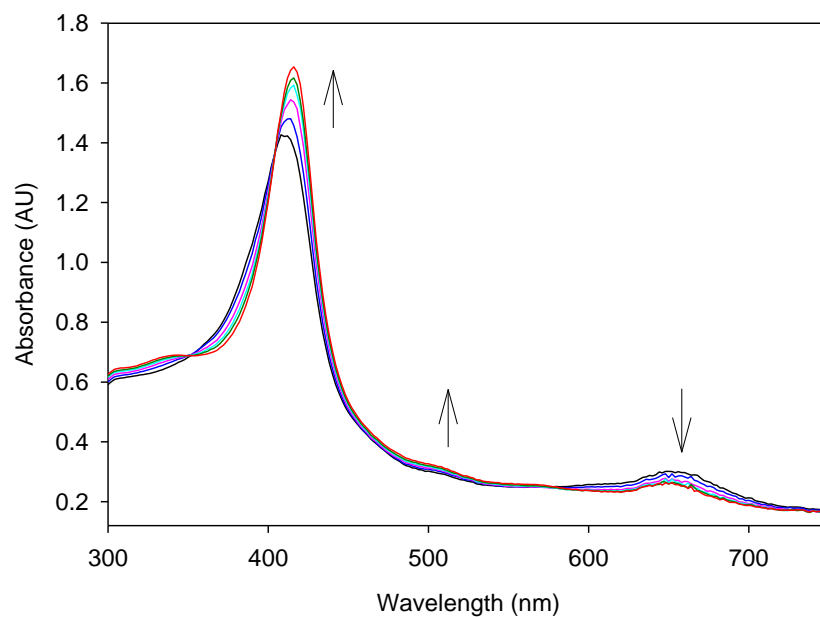

**Fig. S2.** Time-resolved spectra for the reaction of photo-generated **3a** with *cis*-cyclooctene (0.5 mM) over 50 s in  $\text{CH}_3\text{CN}$  at 22 °C.

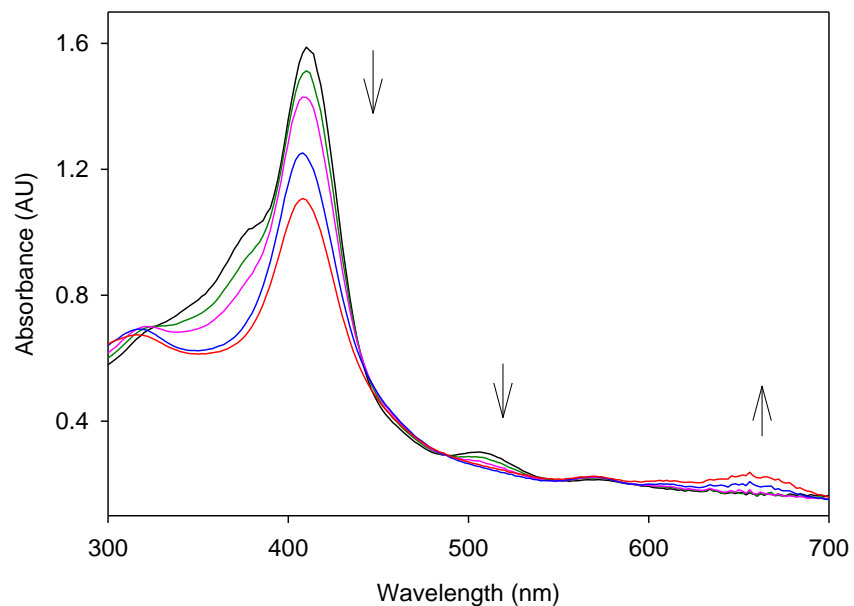

**Fig. S3.** Time-resolved spectra of **3b** ( $8.0 \times 10^{-6}$  M) following irradiation of **2b** with visible light (100 W) in anaerobic  $\text{CH}_3\text{CN}$  solution at 22 °C. Spectra were recorded at  $t = 0, 1, 3, 5$  and 6 min.
